# Supplementary material for: Characterizing the Changes in Permafrost Thickness across Tibetan Plateau
Source: MDPI journal article supplement (doi:10.3390/rs15010206), 2022-12-30
Supplement: s1 [file s1]

# Supplementary Materials

Table.S1

Table.S1. Geothermal gradient ( $G_T$ ) used in this study

| Longitude | Latitude | $G_T$ (°C/km) |
|-----------|----------|---------------|
| 88.96667  | 31.46667 | 38.7          |
| 89.81667  | 31.96667 | 55.5          |
| 90.31667  | 29.83333 | 158.9         |
| 90.46667  | 30.11667 | 32.7          |
| 90.65     | 30.25    | 65.3          |
| 90.86667  | 29.9     | 35.6          |
| 91.01667  | 29.93333 | 22.8          |
| 91.06667  | 29.78333 | 24.3          |
| 91.88333  | 31.38333 | 99.3          |
| 91.98333  | 29.25    | 14.8          |
| 92.03333  | 34.1     | 34.1          |
| 95.1      | 36.16667 | 20.1          |
| 100.35    | 30.65    | 22.4          |
| 101.7333  | 36.8     | 52.8          |
| 101.75    | 36.76667 | 54.7          |
| 101.6667  | 36.91667 | 17            |
| 94.18333  | 35.71667 | 40            |
| 94.01667  | 35.71667 | 85            |
| 94.3      | 35.73333 | 80            |
| 93.06667  | 35.2     | 63            |
| 92.43333  | 34.2     | 80            |
| 92.35     | 33.86667 | 66            |
| 91.85     | 33.23333 | 50            |
| 91.7      | 32.38333 | 50            |
| 99.2      | 38.25    | 60            |
| 94.9      | 36.08333 | 13.3          |
| 93.6      | 35.43333 | 73.22         |
| 92.88333  | 32.73333 | 41.31         |
| 93.45     | 35.36667 | 45.37         |
| 92.23333  | 33.76667 | 47.14         |
